# Supplementary material for: Simulation of an Isolated System Behavior at High RES Penetration Coupled With Storage
Source: Research Square preprint supplement (doi:10.21203/rs.3.rs-1111410/v1), 2021-11-30
Supplement: Supplementary file 1 [file 3cfd18556a833949e3708330.docx]

**APPENDIX I**

**Scen1 generators and their characteristics**

**Scen2 generators and their characteristics**

**Scen2.1 generators and their characteristics**

**Scen2.2 generators and their characteristics**

**Scen2.3 generators and their characteristics**

**Scen2.4 generators and their characteristics**

**Scen3 generators and their characteristics**

**Scen3.1 generators and their characteristics**

# APPENDIX 2

Dispa-SET simulation results graphs – (selection)

SIMULATION SCENARIOS

Scen2.1

Scen3.

# APPENDIX 3

Dispa-SET additional simulation results graphs

SIMULATION SCENARIOS

Scen2.1s2
